# Supplementary material
Source: Springer Nature journal article supplement (https://www.springermedizin.de/resource/supplementary/12936_2014_3588_MOESM2_ESM.pdf/9545980)

**Probability of Hatching (%)**

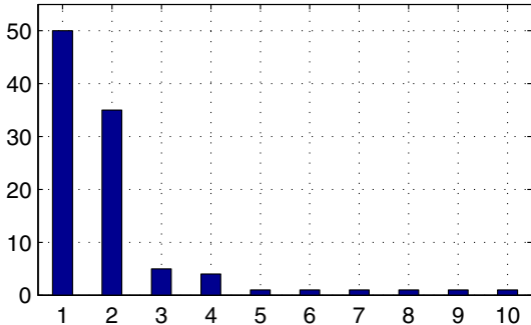

**Day**

Supplement: MOESM2 [file 9545980]
